# Supplementary material
Source: PubMed Central journal article supplement (PMC10066936)

Supplemental Figure 1  
*Momentary-level correlations of EMA PANAS items*

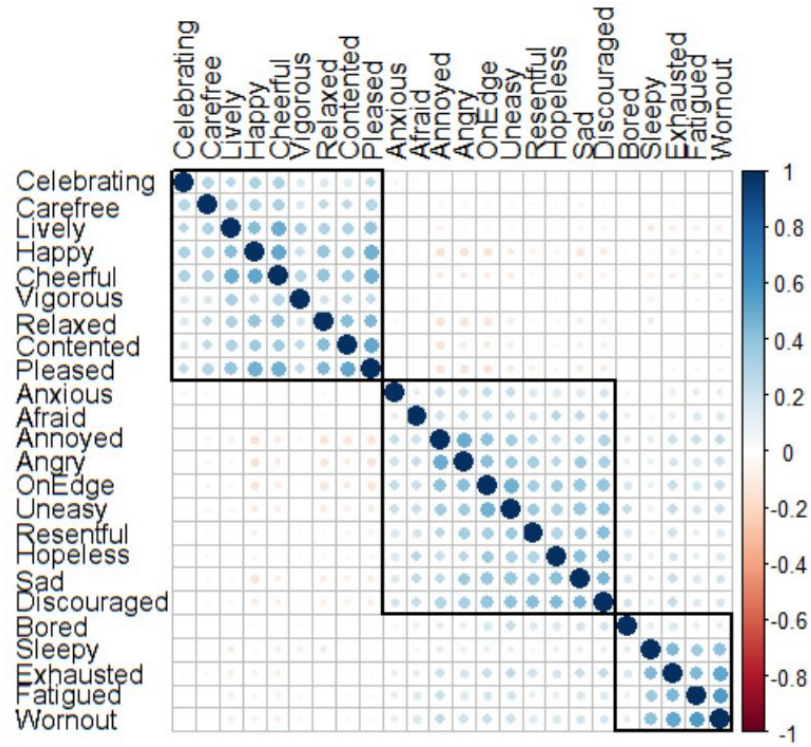

Supplement: NIHMS1880743-supplement-Supplemental_Material_1.pdf [file NIHMS1880743-supplement-Supplemental_Material_1.pdf]

Supplemental Figure 3  
*Variance decomposition of EMA PANAS items*

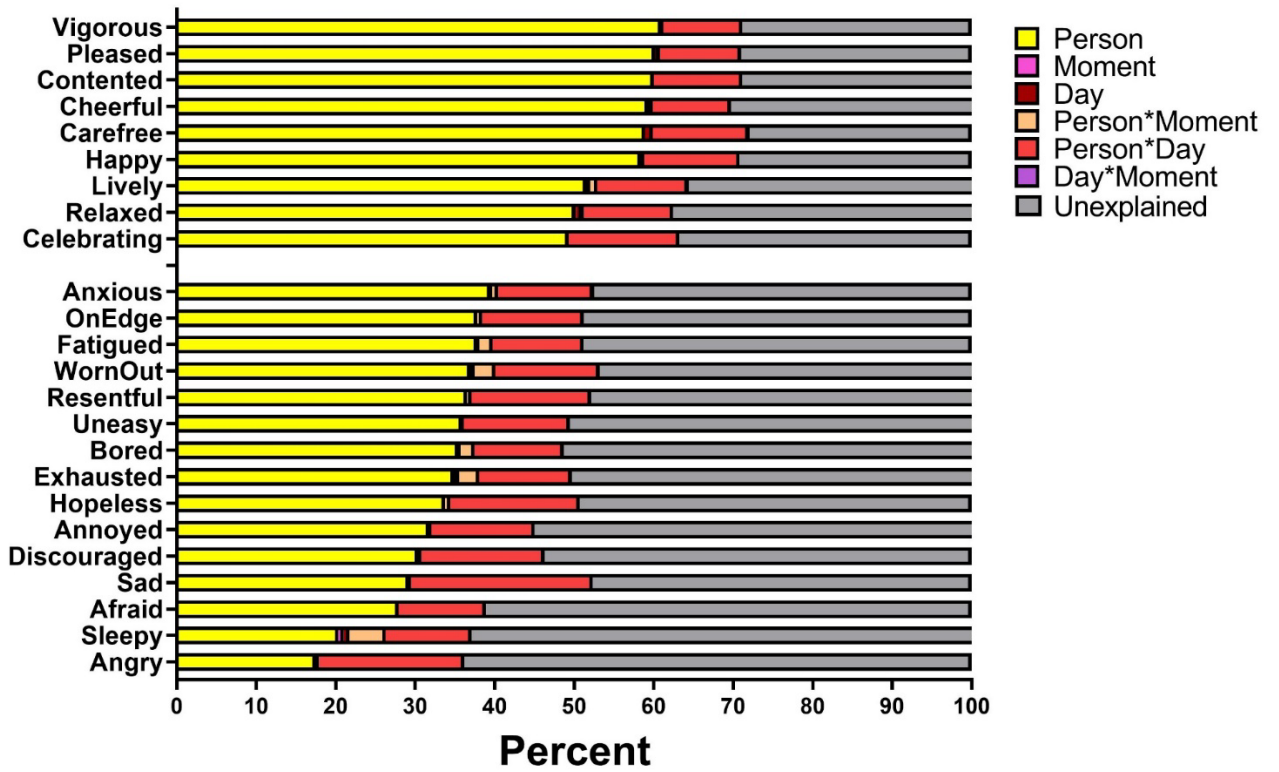

Supplement: NIHMS1880743-supplement-Supplemental_Material_3.pdf [file NIHMS1880743-supplement-Supplemental_Material_3.pdf]
